# Supplementary material for: In situ infrared study of photo-generated electrons and adsorbed species on nitrogen-doped TiO2 in dye-sensitized solar cells
Source: Royal Society of Chemistry journal article supplement (doi:10.1039/c8cp01925h), 2018-01-01
Supplement: c8cp01925h1.pdf [file c8cp01925h1.pdf]

## SUPPORTING INFORMATION

**Table S1** Comparison of literature results of DSSCs with different nitrogen doping methods on TiO<sub>2</sub>.

| N-doping method           | WE area (cm <sup>2</sup> ) | Eff undoped DSSC (%) | Eff N-doped DSSC (%) | Jsc N-doped DSSC (mA/cm <sup>2</sup> ) | Voc N-doped DSSC (V) | FF N-doped DSSC | N atom. (%) | TiO <sub>2</sub> particle size (nm) | WE thickness (μm) | Dye  |
|---------------------------|----------------------------|----------------------|----------------------|----------------------------------------|----------------------|-----------------|-------------|-------------------------------------|-------------------|------|
| sol-gel <sup>1</sup>      | 0.36                       | 4.04                 | 6.01                 | 12.82                                  | 0.607                | 0.77            | -           | 550                                 | 12                | N719 |
| solvothermal <sub>2</sub> | 0.25                       | 1.56                 | 4.70                 | 11.16                                  | 0.750                | 0.56            | -           | Ø 241 nm nanofiber                  | 12-15             | N719 |
| gas trt <sup>3</sup>      | 0.16                       | 8.90                 | 10.10                | 19.05                                  | 0.778                | 0.68            | 2.49        | 25                                  | 15                | N719 |
| sol-gel <sup>3</sup>      | 0.16                       | 7.20                 | 8.30                 | 15.58                                  | 0.784                | 0.68            | 2.49        | 25                                  | 15                | N719 |
| sputter <sup>4</sup>      | 2.25                       | lower                | higher               | 2.32                                   | 0.670                | -               | -           | -                                   | 2                 | N3   |
| sol-gel <sup>5</sup>      | -                          | 5.34                 | 5.10                 | 11.00                                  | 0.745                | 0.62            | -           | -                                   | 18                | N719 |
| solvothermal <sub>6</sub> | 0.1                        | 1.52                 | 2.53                 | 8.82                                   | 0.670                | 0.43            | 1.43        | 10 nm N-TiO <sub>2</sub>            | 1.8               | N719 |
| gas trt (in-house)        | 0.25                       | 5.51                 | 6.60                 | 15.52                                  | 0.727                | 0.59            | 1.63        | 20                                  | 15                | N719 |

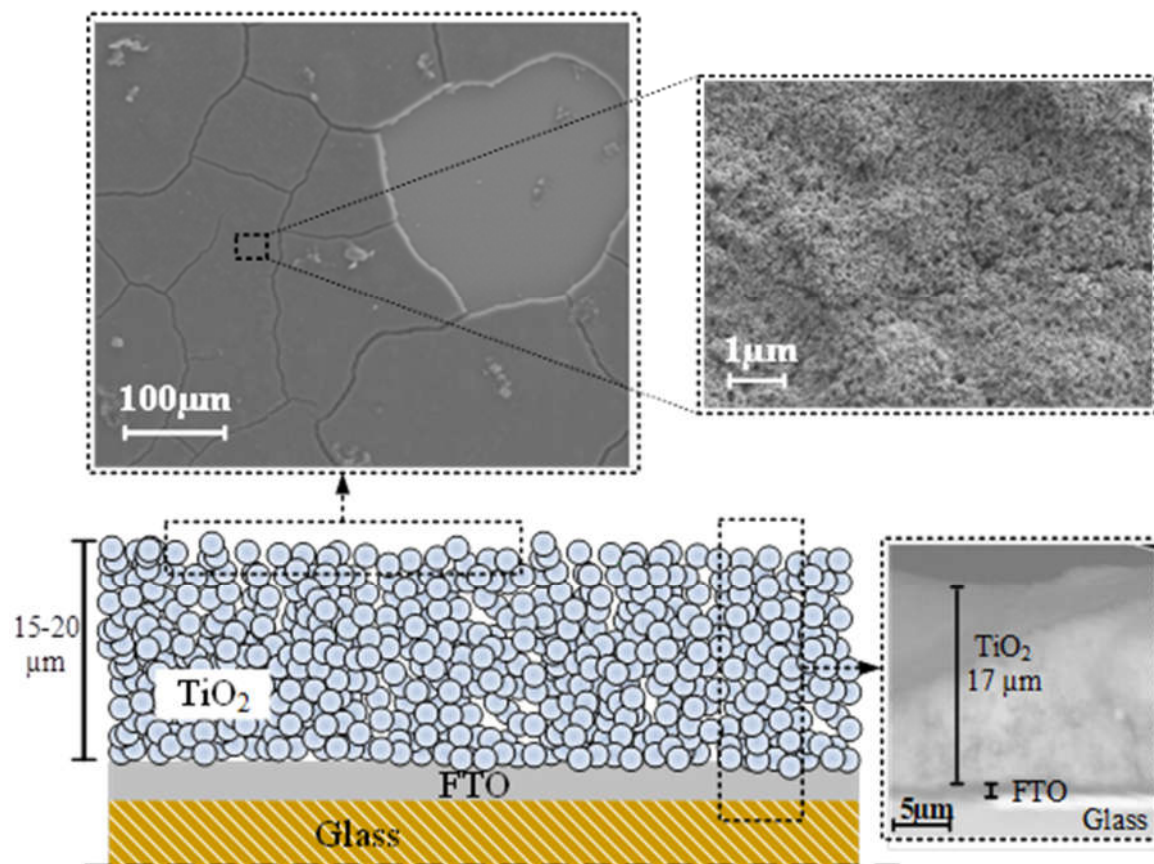

**Fig. S1** SEM images of the cross section and surface of a fabricated TiO<sub>2</sub> working electrode

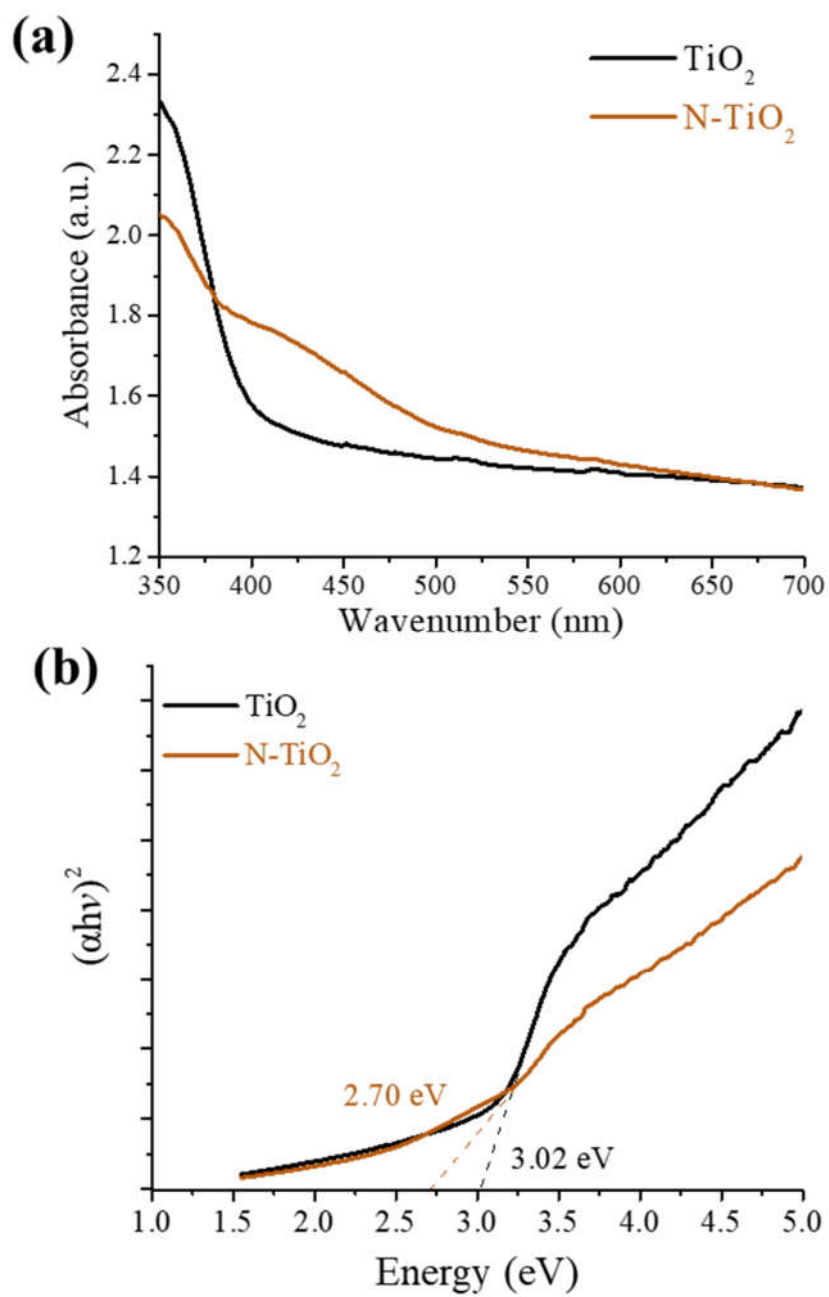

**Fig. S2** (a) UV-Vis spectra and (b) Tauc plot of  $\text{TiO}_2$  and  $\text{N-TiO}_2$  working electrodes.

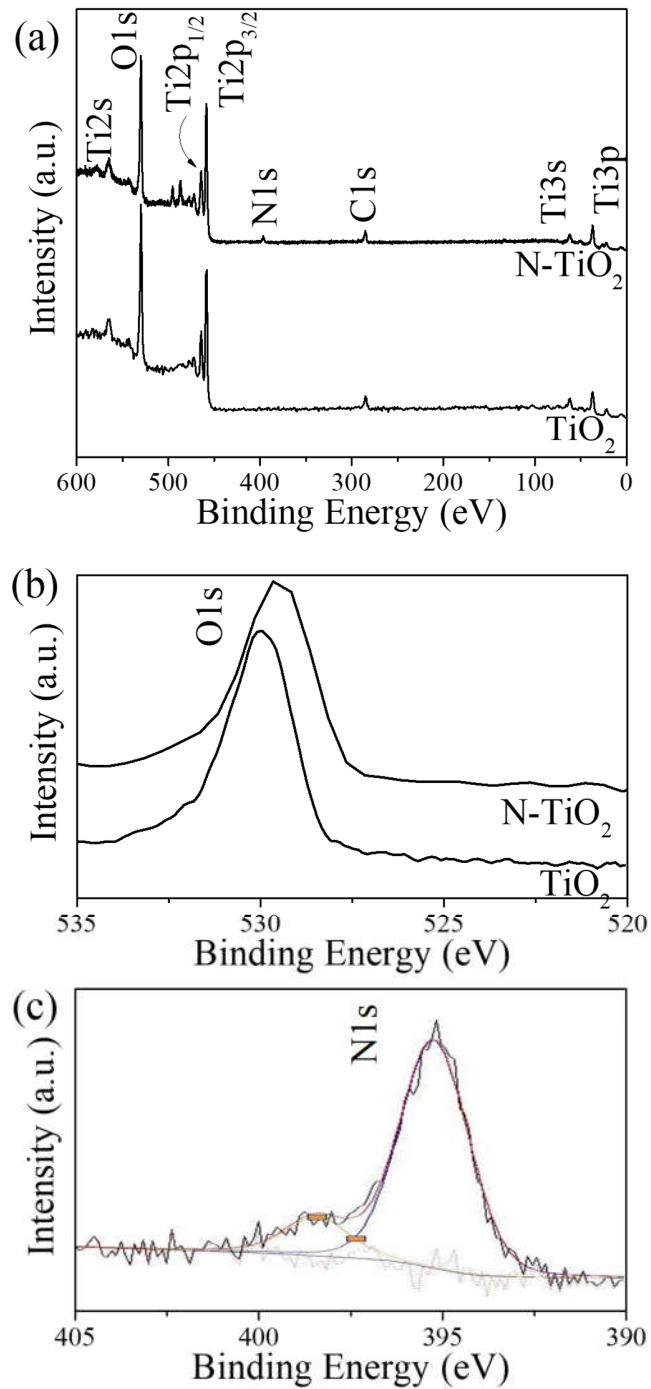

**Fig. S3** (a) XPS spectra of TiO<sub>2</sub> and N-TiO<sub>2</sub> working electrodes, (b) XPS spectra at O1s core level of TiO<sub>2</sub> and N-TiO<sub>2</sub> working electrodes, and (c) XPS spectrum at N1s core level of N-TiO<sub>2</sub> working electrode.

Figure S3 shows N1s spectrum of N-doped TiO<sub>2</sub>. The N1s peak was deconvoluted into two peaks attributed to O-Ti-N at 398.8 eV and N-Ti-N at 395.9 eV. The higher binding energy peak was assigned to O-Ti-N due to the reduced electron density of nitrogen compared with oxygen in O-Ti-O.<sup>7-9</sup> The N content of the N-TiO<sub>2</sub> catalyst was determined to be  $A_{N/Ti} = 5.4/100$  atomic ratio.

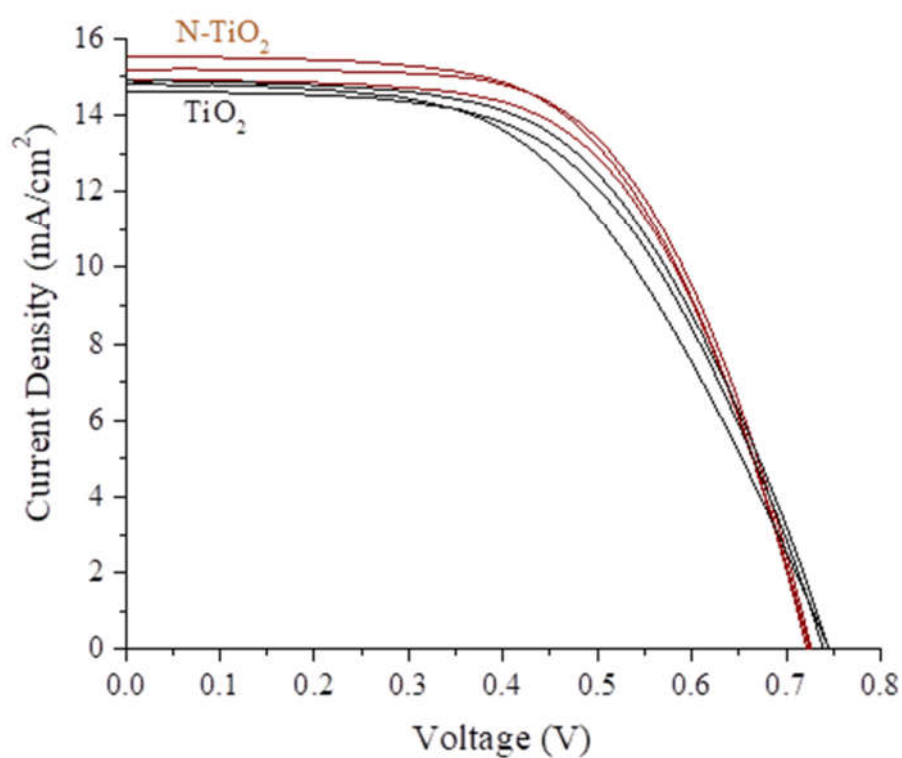

**Fig S4** Repeat results of current density-voltage curves of DSSCs based on TiO<sub>2</sub> and N-TiO<sub>2</sub> working electrodes.

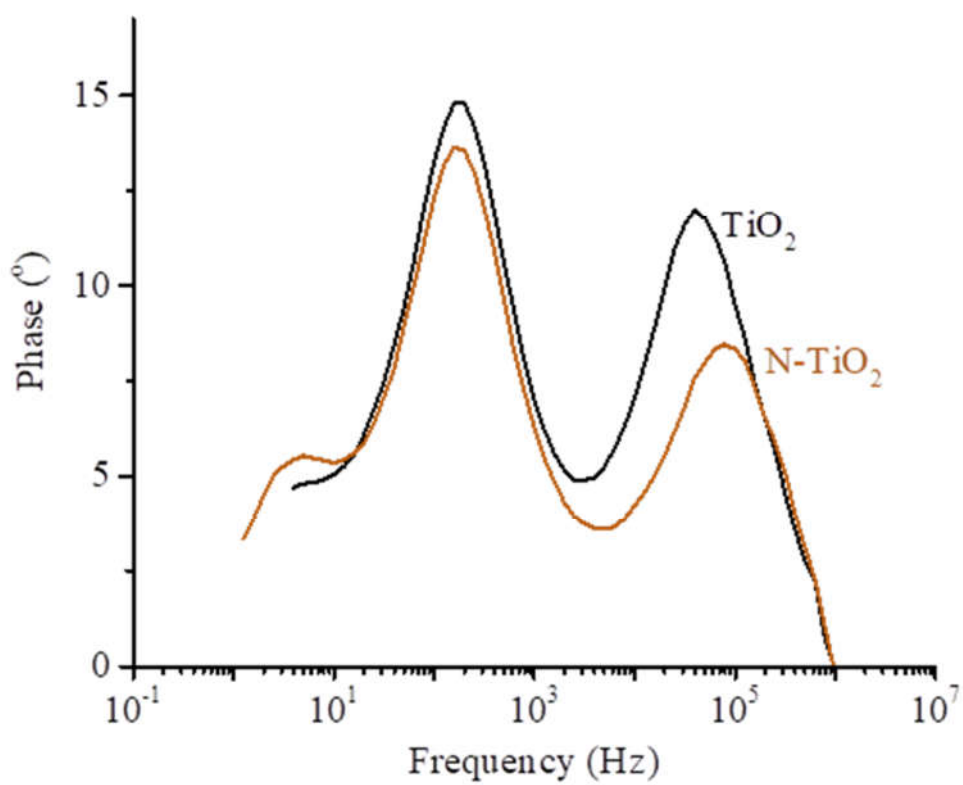

**Fig. S5** Bode plot of TiO<sub>2</sub>/N719 and N-TiO<sub>2</sub>/N719 DSSCs

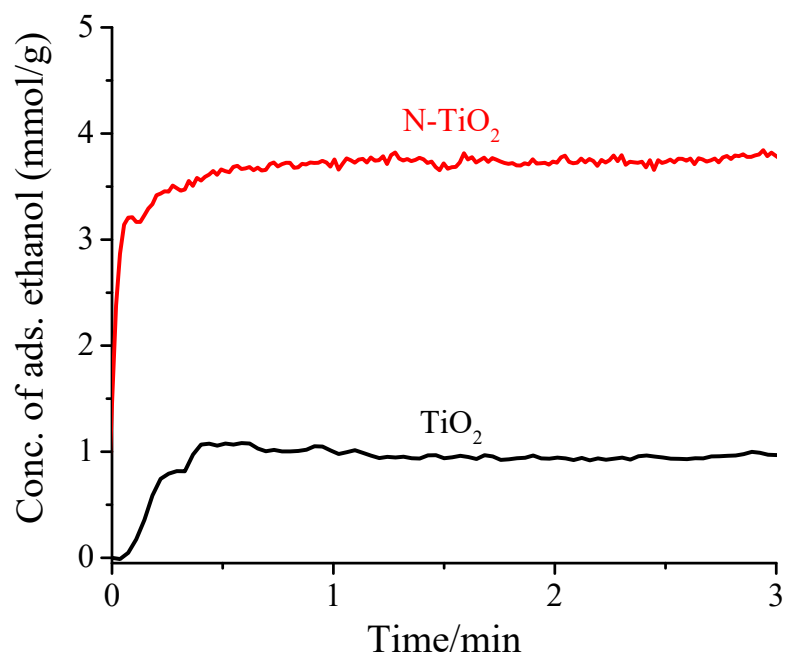

**Fig. S6** Adsorption rate and amount of ethanol on TiO<sub>2</sub> and N-TiO<sub>2</sub>

**Table S2.** Literature results of bandgap and Fermi level on TiO<sub>2</sub> and N-TiO<sub>2</sub><sup>10</sup>

| Catalyst             | N %   | E <sub>bg</sub> (eV) | E <sub>f</sub> (V, NHE) |
|----------------------|-------|----------------------|-------------------------|
| TiO <sub>2</sub>     | 0.00  | 3.18                 | -0.63                   |
| TiO <sub>2</sub> -N1 | 1.01  | 2.46                 | -0.56                   |
| TiO <sub>2</sub> -N1 | 11.70 | 2.20                 | -0.47                   |

**Table S3.** Comparison of materials' property with literature/label value

| Property                          | Experiment results       | Literature/label value                     |
|-----------------------------------|--------------------------|--------------------------------------------|
| Particle size of TiO <sub>2</sub> | 25 ± 5 nm by SEM         | 25 nm (Aldrich)                            |
| N719 dye                          | FTIR spectrum in Fig. S7 | <i>RSC Adv.</i> , 2015,5,<br>102803-102810 |

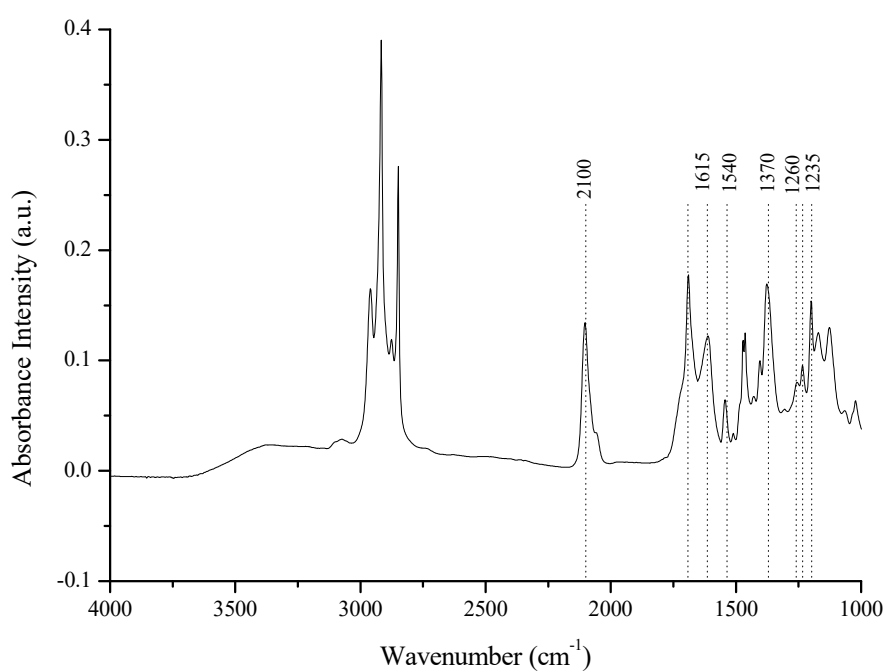

**Fig. S7** FTIR spectrum of N719 dye used in this study



## Reference:

1. P. Xiang, X. Li, H. Wang, G. Liu, T. Shu, Z. Zhou, Z. Ku, Y. Rong, M. Xu, L. Liu, M. Hu, Y. Yang, W. Chen, T. Liu, M. Zhang and H. Han, *Nanoscale Research Letters*, 2011, **6**, 606.
2. M. Motlak, M. S. Akhtar, N. A. M. Barakat, A. M. Hamza, O. B. Yang and H. Y. Kim, *Electrochimica Acta*, 2014, **115**, 493-498.
3. W. Guo, L. Wu, Z. Chen, G. Boschloo, A. Hagfeldt and T. Ma, *Journal of Photochemistry and Photobiology A: Chemistry*, 2011, **219**, 180-187.
4. D. A. Duarte, M. Massi and A. S. da Silva Sobrinho, *International Journal of Photoenergy*, 2014, **2014**, 13.
5. H. Tian, L. Hu, C. Zhang, W. Liu, Y. Huang, L. Mo, L. Guo, J. Sheng and S. Dai, *The Journal of Physical Chemistry C*, 2010, **114**, 1627-1632.
6. H. Wang, H. Li, J. Wang, J. Wu, D. Li, M. Liu and P. Su, *Electrochimica Acta*, 2014, **137**, 744-750.
7. J. Wang, W. Zhu, Y. Zhang and S. Liu, *The Journal of Physical Chemistry C*, 2007, **111**, 1010-1014.
8. G. Yang, Z. Jiang, H. Shi, T. Xiao and Z. Yan, *Journal of Materials Chemistry*, 2010, **20**, 5301-5309.
9. X. Chen and C. Burda, *The Journal of Physical Chemistry B*, 2004, **108**, 15446-15449.
10. H. Kisch, S. Sakthivel, M. Janczarek and D. Mitoraj, *The Journal of Physical Chemistry C*, 2007, **111**, 11445-11449.
